# Supplementary material for: Abdominal Waist Circumference and Subcutaneous Adipose Tissue Thickness Predicts Development of Post-Transplant Diabetes Mellitus
Source: Research Square preprint supplement (doi:10.21203/rs.3.rs-8543193/v1), 2026-04-05
Supplement: Supplementary file 1 [file d697ab8ce35d5ccdba8ac3b7.docx]

**Supplementary Table 1:** The pairwise comparison of the ROC (receiver-operating characteristic) curves for body-mass index, abdominal waist circumference and abdominal subcutaneous adipose tissue thickness.

|  | **Body Mass Index ~ Abdominal Waist Circumference** | **Body Mass Index ~ Abdominal Subcutaneous Adipose Tissue Thickness** | **Abdominal Waist Circumference ~ Subcutaneous Adipose Tissue Thickness** |
| --- | --- | --- | --- |
| **Difference between areas** | 0,0844 | 0,118 | 0,0333 |
| **95% Confidence Interval** | 0,04-0,12 | 0,06-0,17 | -0,01-0,08 |
| **Significance level** | P = 0,0001 | P = 0,0001 | P = 0,1749 |
